# Supplementary material for: Global analysis of ginsenoside Rg1 protective effects in β-amyloid-treated neuronal cells
Source: PubMed Central journal article supplement — J Ginseng Res. 2016 Dec 8;41(4):566–71. doi: 10.1016/j.jgr.2016.12.003 (PMC5628347; doi:10.1016/j.jgr.2016.12.003), 2016-12-08
Supplement: mmc2.pdf [file mmc2.pdf]

**Table S2.** Mitochondrial protein list associated with Alzheimer disease <sup>1)</sup>

| Accession no. | Gene name | Protein description                                              | Log <sub>2</sub> ratio (treat/control) |
|---------------|-----------|------------------------------------------------------------------|----------------------------------------|
| O00483        | NDUFA4    | Cytochrome c oxidase subunit NDUFA4                              | -0.105                                 |
| P61604        | HSPE1     | 10 kDa heat shock protein, mitochondrial                         | -0.010                                 |
| P99999        | CYCS      | Cytochrome c                                                     | 0.000                                  |
| P45880-1      | VDAC2     | Isoform 1 of voltage-dependent anion-selective channel protein 2 | 0.080                                  |
| P31930        | UQCRC1    | Cytochrome b-c1 complex subunit 1, mitochondrial                 | 0.089                                  |
| Q9Y277-2      | VDAC3     | Isoform 2 of voltage-dependent anion-selective channel protein 3 | 0.098                                  |
| P21796        | VDAC1     | Voltage-dependent anion-selective channel protein 1              | 0.163                                  |
| Q12931-2      | TRAP1     | Isoform 2 of heat shock protein 75 kDa, mitochondrial            | 0.168                                  |
| Q9NS69        | TOMM22    | Mitochondrial import receptor subunit TOM22                      | 0.222                                  |
| O94826        | TOMM70A   | Mitochondrial import receptor subunit TOM70                      | 0.275                                  |
| P00403        | MT-CO2    | Cytochrome c oxidase subunit 2                                   | 0.279                                  |
| P10809        | HSPD1     | 60 kDa heat shock protein, mitochondrial                         | 0.356                                  |
| P20674        | COX5A     | Cytochrome c oxidase subunit 5A, mitochondrial                   | 0.837                                  |
| O96008        | TOMM40    | Mitochondrial import receptor subunit TOM40 homolog              | 4.750                                  |

<sup>1)</sup> Accession Nos. are from the Uniprot database. The fold change was calculated using Rg1 treated/control (unlabeled/labeled) ratios quantitated from integrated proteomics software. Ratios were obtained from  $n = 3$ .
